# Supplementary material
Source: PubMed Central journal article supplement (PMC4160325)
Supplement: NIHMS419998-supplement-01.pdf [file NIHMS419998-supplement-01.pdf]

Table S1: Nomenclature of monomers

| <b>Acronym</b> | <b>Full name</b>                                                             |
|----------------|------------------------------------------------------------------------------|
| <b>Am</b>      | <b>Acrylamide</b>                                                            |
| <b>A2AGA</b>   | <b>N-Acryloyl 2-glycine</b>                                                  |
| <b>A4ABA</b>   | <b>N-Acryloyl 4-aminobutyric acid</b>                                        |
| <b>A6ACA</b>   | <b>N-Acryloyl 6-aminocaproic acid</b>                                        |
| <b>A8ACA</b>   | <b>N-Acryloyl 8-aminocaprylic acid</b>                                       |
| <b>SS</b>      | <b>Sodium 4-vinylbenzenesulfonate</b>                                        |
| <b>SPA</b>     | <b>3-Sulfopropyl acrylate potassium salt</b>                                 |
| <b>MEDSAH</b>  | <b>[2-(Methacryloyloxy)ethyl]dimethyl-(3-sulfopropyl) ammonium hydroxide</b> |
| <b>BisAm</b>   | <b>N,N'-Methylenebisacrylamide</b>                                           |

Table S2: Composition, nomenclature, and characterization of the hydrogels

| Sample code                               | Comonomer (B)    | Mole ratio of Am <sub>x</sub> :B <sub>y</sub> (BisAm) | Elastic modulus (kPa) | Water contact angle (°) |
|-------------------------------------------|------------------|-------------------------------------------------------|-----------------------|-------------------------|
| PAm <sub>6</sub> -co-PA2AGA <sub>2</sub>  | A2AGA (2.5mmol)  | 6:2 (0.26)                                            | 353.0±13.9            | 20.9±1.4                |
| PAm <sub>6</sub> -co-PA4ABA <sub>2</sub>  | A4ABA (2.5mmol)  | 6:2 (0.26)                                            | N/A                   | 36.1±1.9                |
| PAm <sub>6</sub> -co-PA6ACA <sub>2</sub>  | A6ACA (2.5mmol)  | 6:2 (0.26)                                            | N/A                   | 53.8±2.7                |
| PAm <sub>6</sub> -co-PA8ACA <sub>2</sub>  | A8ACA (2.5mmol)  | 6:2 (0.26)                                            | N/A                   | 67.3±1.6                |
| PAm <sub>6</sub> -co-PSPA <sub>2</sub>    | SPA (2.5mmol)    | 6:2 (0.26)                                            | 342.5±19.7            | 32.6±1.2                |
| PAm <sub>6</sub> -co-PMEDSAH <sub>2</sub> | MEDSAH (2.5mmol) | 6:2 (0.26)                                            | 378.8±36.6            | 66.3±2.3                |
| PAm <sub>6</sub> -co-PSS <sub>0.5</sub>   | SS (0.625mmol)   | 6:0.5 (0.26)                                          | 327.8±7.1             | 14.3±1.7                |
| PAm <sub>6</sub> -co-PSS <sub>1</sub>     | SS (1.25mmol)    | 6:1 (0.26)                                            | 382.9±5.1             | 17.4±0.3                |
| PAm <sub>6</sub> -co-PSS <sub>2</sub>     | SS (2.5mmol)     | 6:2 (0.26)                                            | 343.7±5.1             | 23.0±2.0                |
| PAm <sub>6</sub> -co-PSS <sub>2</sub> -M* | SS (2.5mmol)     | 6:2 (0.19)                                            | 137.6±6.9             | 20.8±0.5                |
| PAm <sub>6</sub> -co-PSS <sub>2</sub> -L* | SS (2.5mmol)     | 6:2 (0.10)                                            | 53.5±2.8              | 17.5±1.5                |

\*PAm<sub>6</sub>-co-PSS<sub>2</sub>-M and PAm<sub>6</sub>-co-PSS<sub>2</sub>-L represent PAm<sub>6</sub>-co-PSS<sub>2</sub> hydrogels with an elastic modulus of 137.6±6.9kPa and 53.5±2.8 kPa, respectively.

Table S3: List of primers used for qRT-PCR

| <b>Gene Symbol</b> | <b>Assay ID</b> |
|--------------------|-----------------|
| SOX17              | Hs00751752_s1   |
| FOXA2              | Hs0023764_m1    |
| CXCR4              | Hs00607978_s1   |
| SOX2               | Hs01053049_s1   |
| Nestin             | Hs00707120_s1   |
| SOX1               | Hs01057642_s1   |
| SMA                | Hs00426835_g1   |
| ACTC               | Hs01109515_m1   |
| NANOG              | Hs04260366_g1   |
| OCT4               | Hs00999634_gH   |
