# Supplementary material
Source: PubMed Central journal article supplement (PMC4160325)

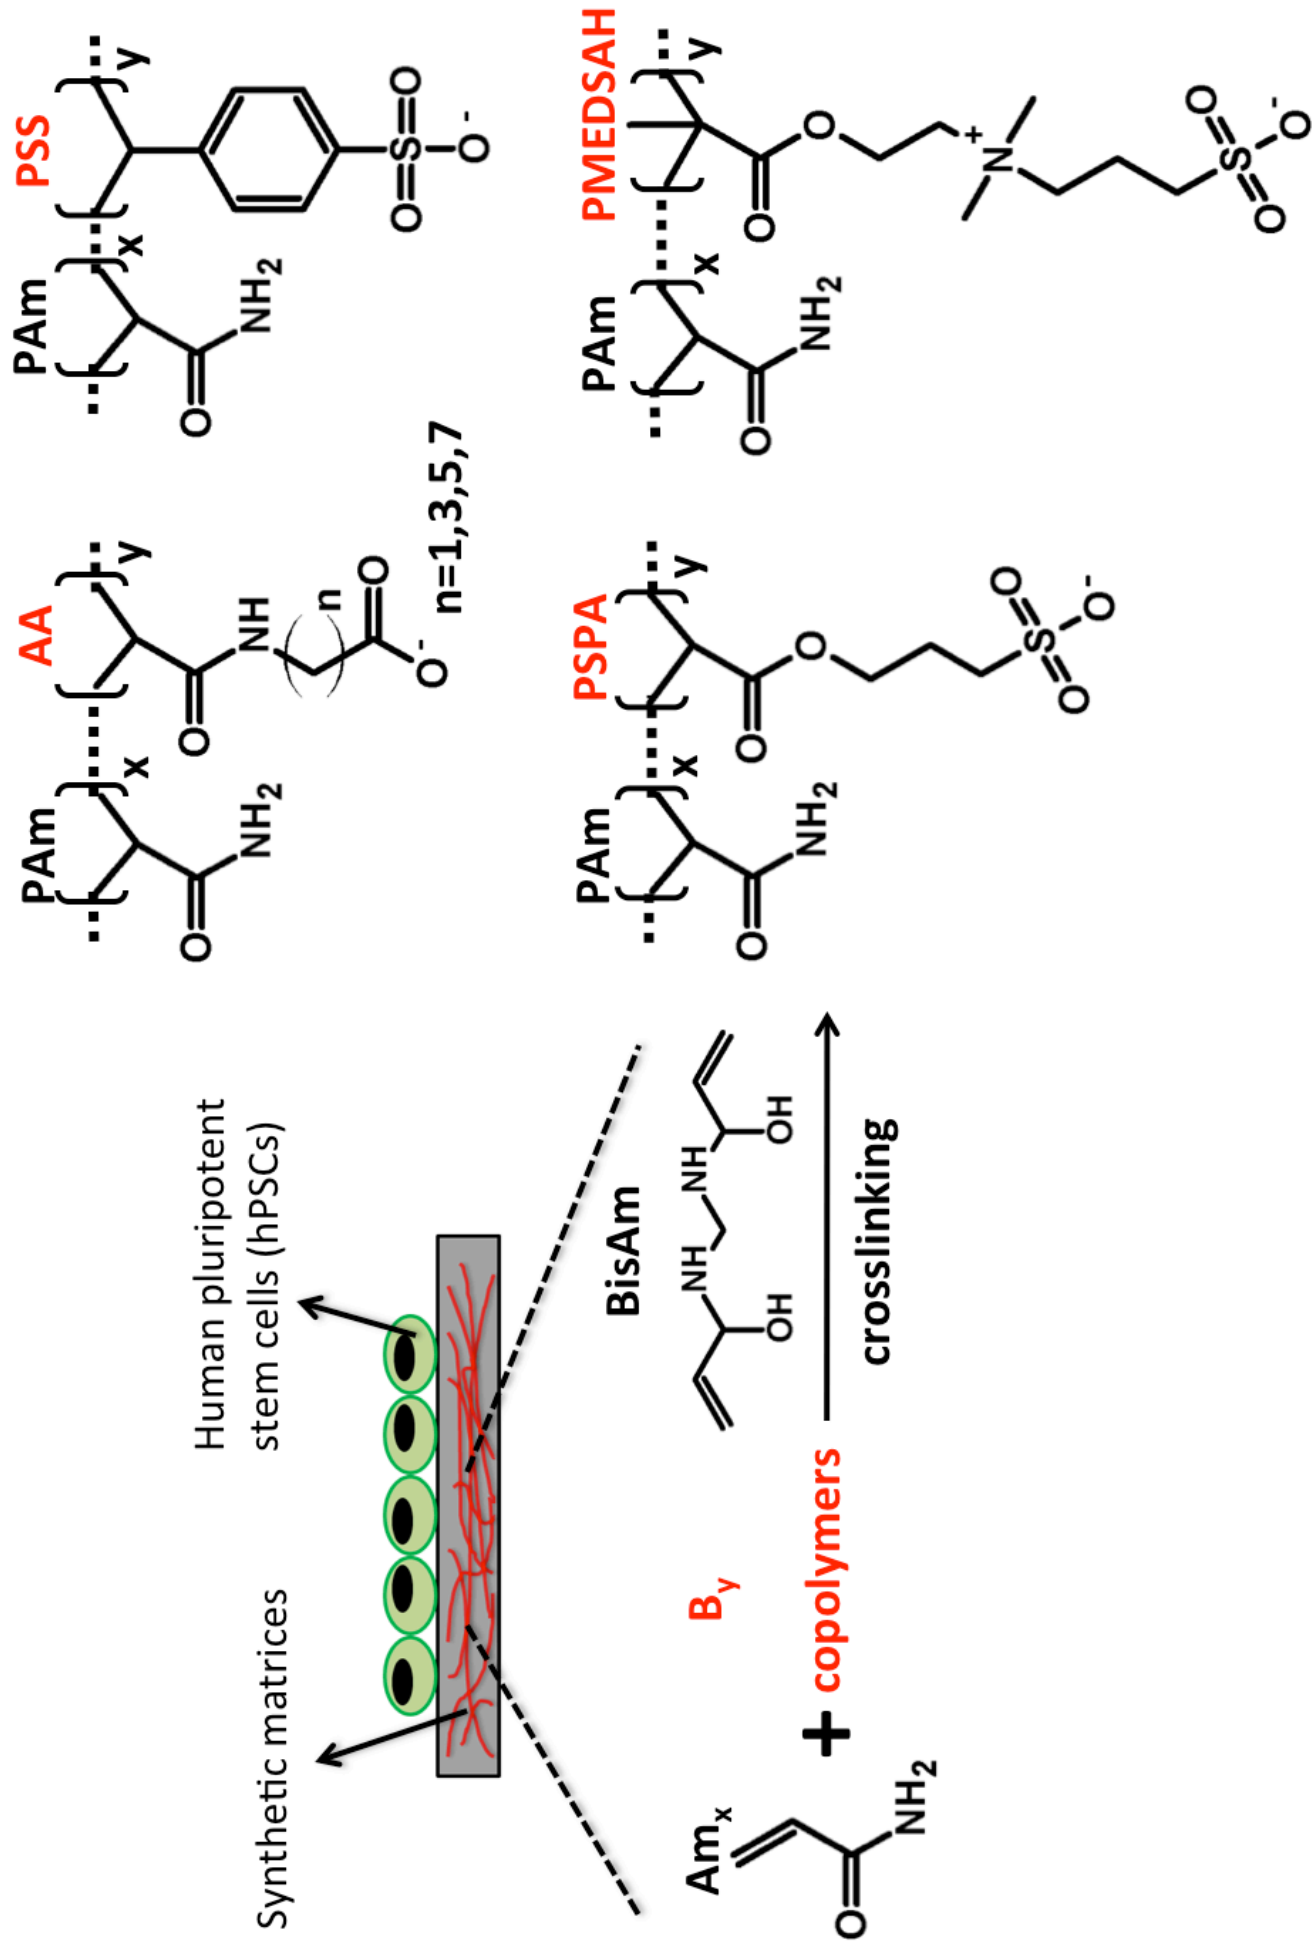

Figure-S1 (Varghese)

Supplement: NIHMS419998-supplement-02.pdf [file NIHMS419998-supplement-02.pdf]

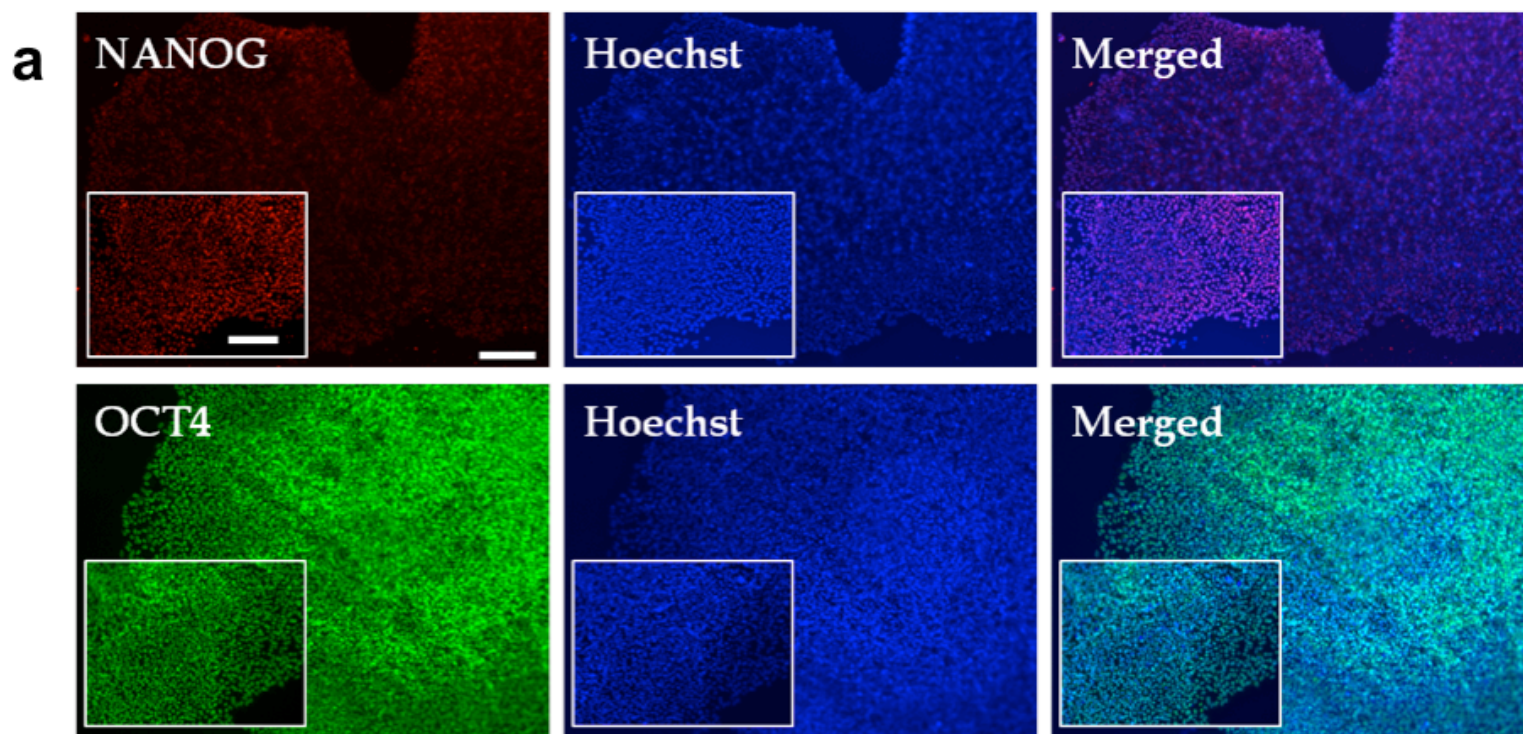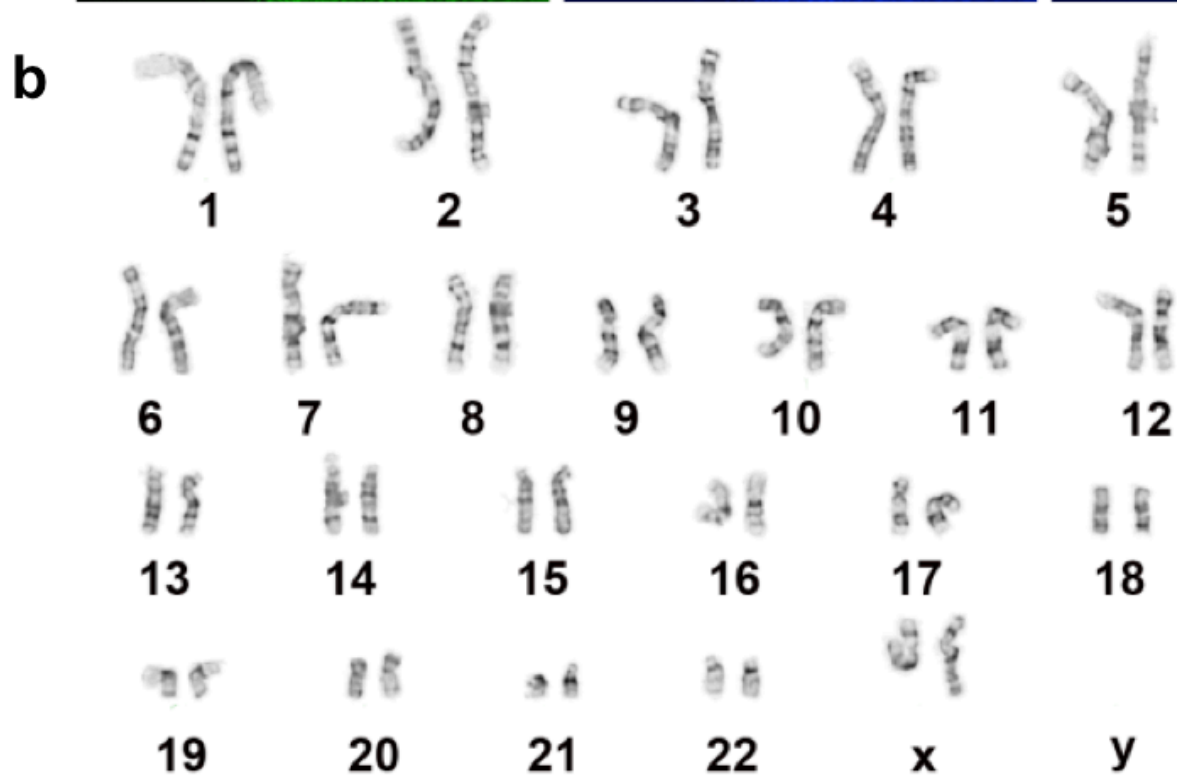

Figure-S2 (Varghese)

Supplement: NIHMS419998-supplement-03.pdf [file NIHMS419998-supplement-03.pdf]

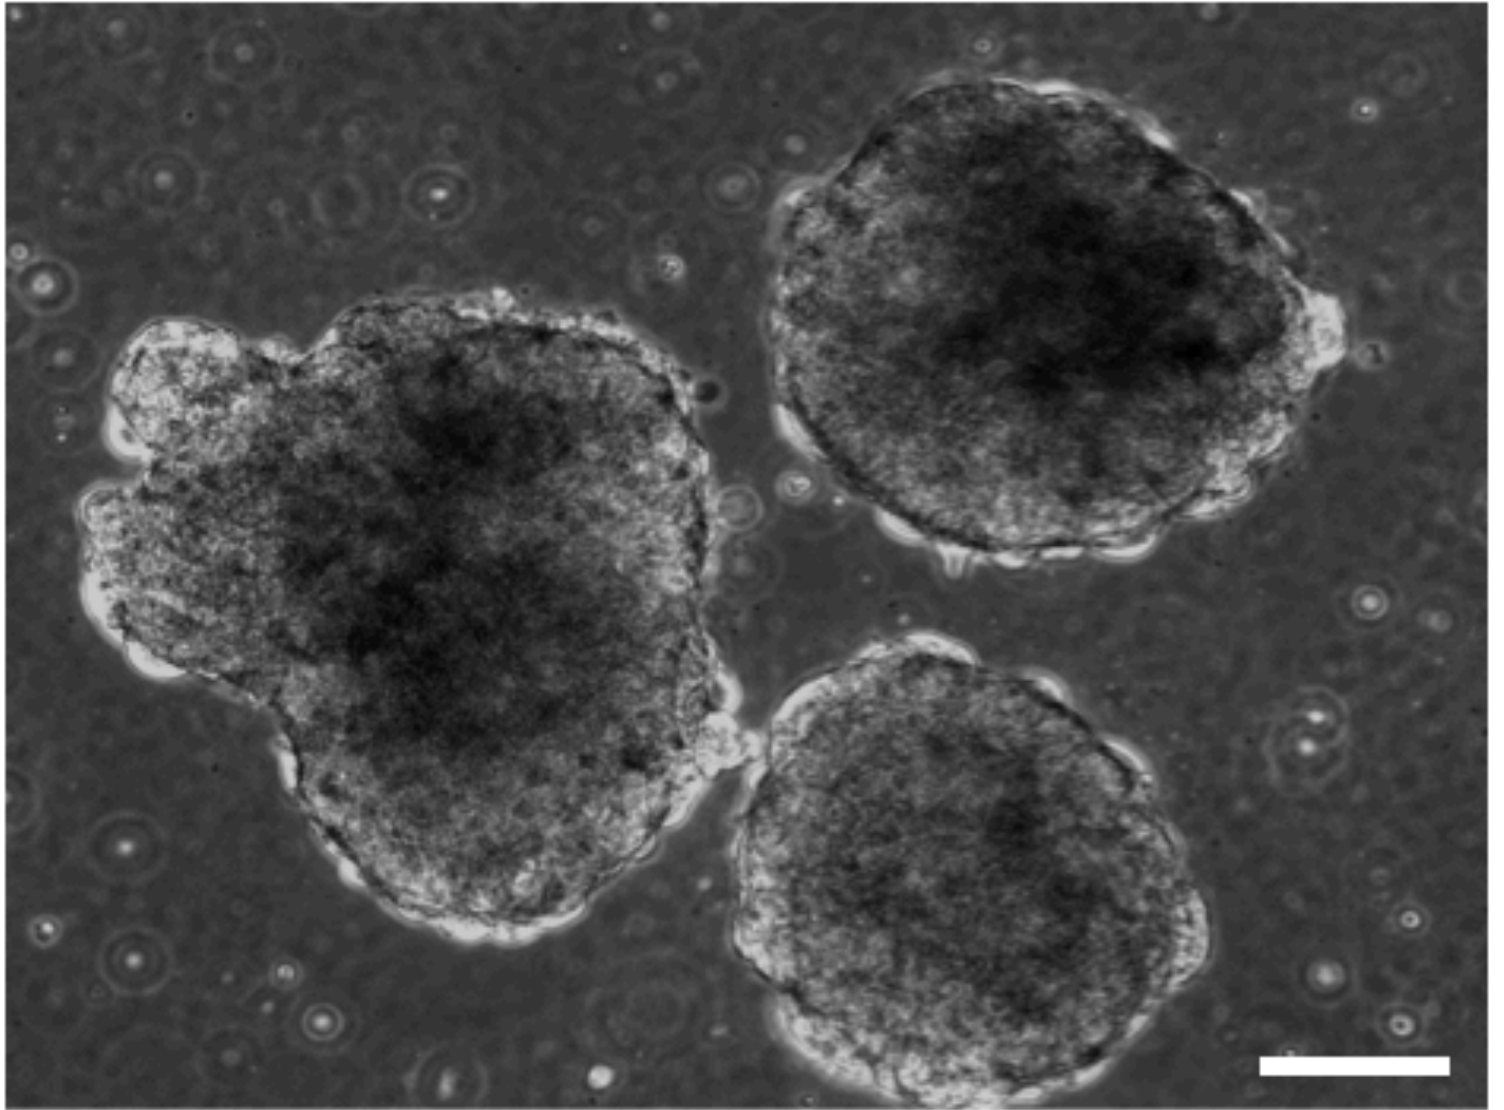

Figure-S3 (Varghese)

Supplement: NIHMS419998-supplement-04.pdf [file NIHMS419998-supplement-04.pdf]

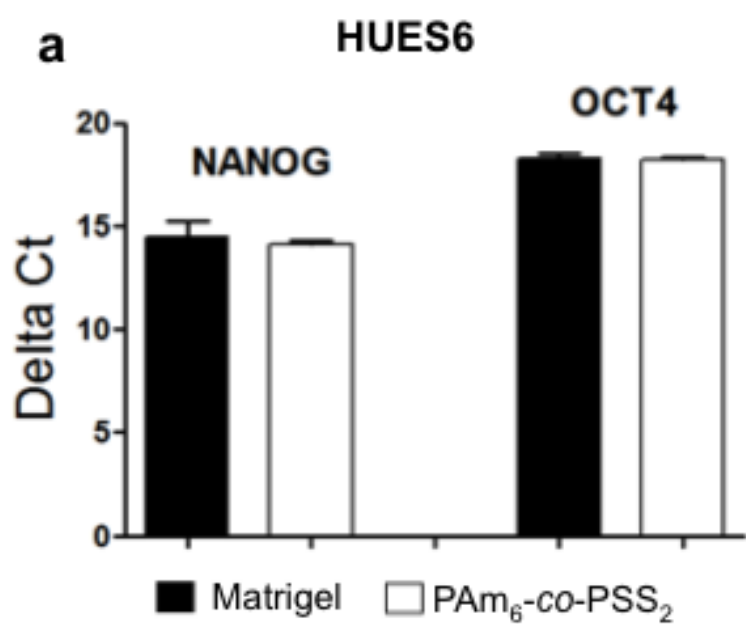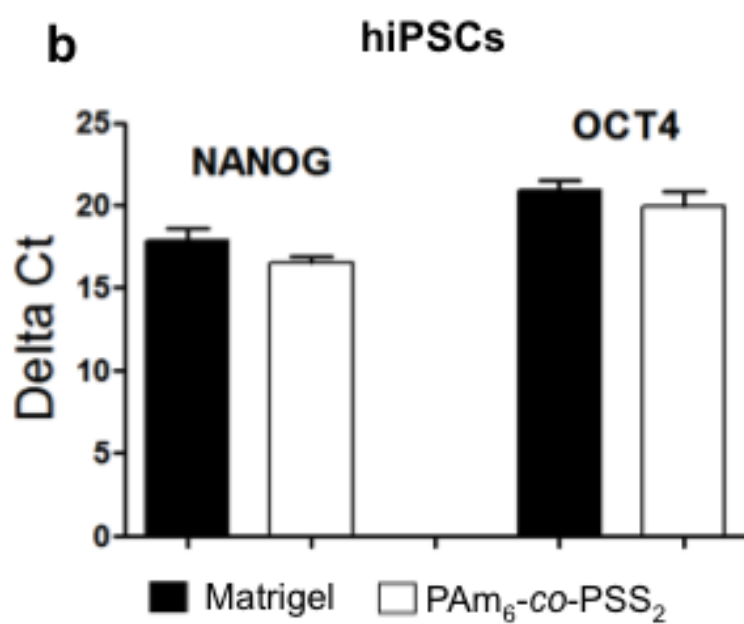

Figure-S4 (Varghese)

Supplement: NIHMS419998-supplement-05.pdf [file NIHMS419998-supplement-05.pdf]

**Day2**

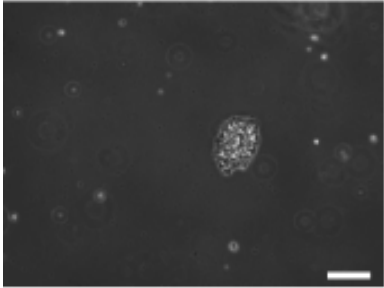

**Day5**

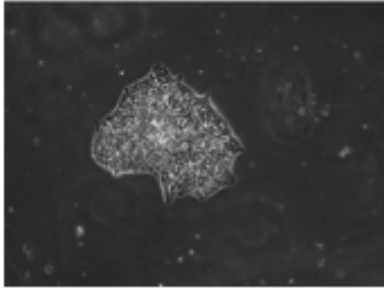

**Day7**

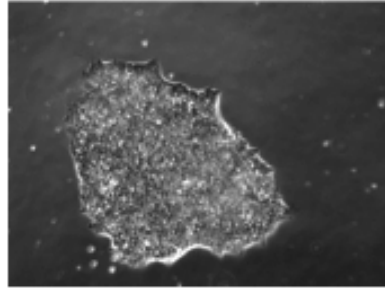

**Day10**

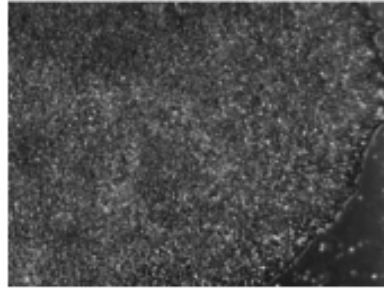

Figure-S5 (Varghese)

Supplement: NIHMS419998-supplement-06.pdf [file NIHMS419998-supplement-06.pdf]

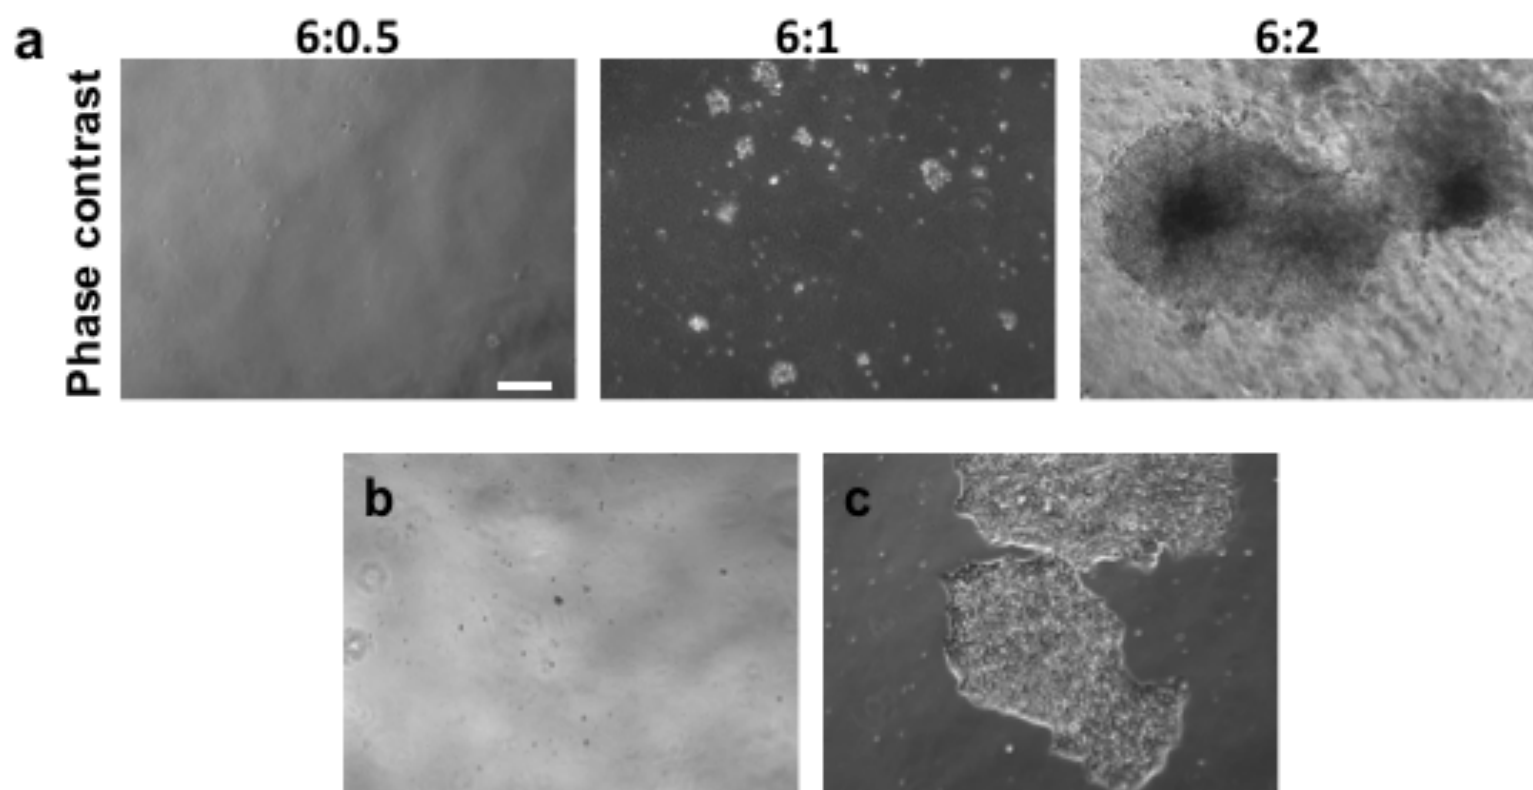

Figure-S6 (Varghese)

Supplement: NIHMS419998-supplement-07.pdf [file NIHMS419998-supplement-07.pdf]

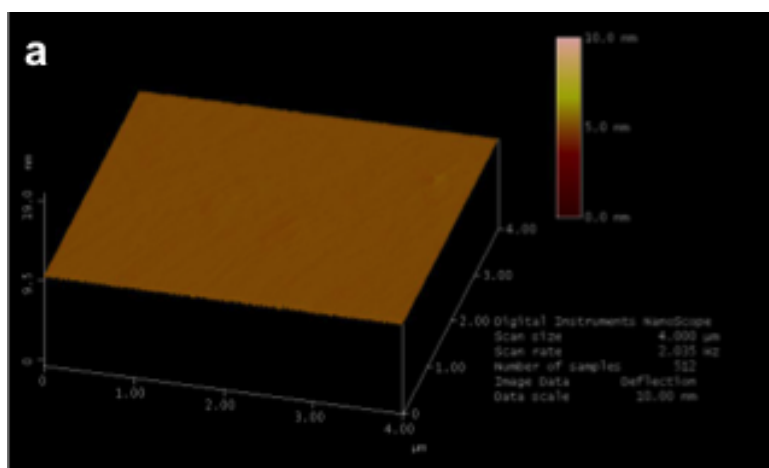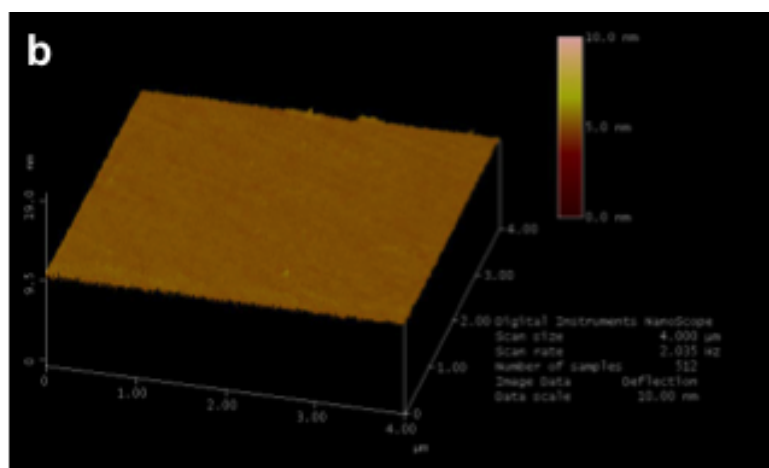

**c**

| Scan Area       | PAm <sub>6</sub> -co-PA2AGA <sub>2</sub> | PAm <sub>6</sub> -co-PSS <sub>2</sub> |
|-----------------|------------------------------------------|---------------------------------------|
| 400 nm x 400 nm | 0.02±0.02                                | 0.02±0.02                             |
| 4 μm x 4 μm     | 0.45±0.03                                | 0.36±0.02*                            |

Figure-S7 (Varghese)

Supplement: NIHMS419998-supplement-08.pdf [file NIHMS419998-supplement-08.pdf]
